# Supplementary material for: An integrative Raman microscopy-based workflow for rapid in situ analysis of microalgal lipid bodies
Source: PubMed Central journal article supplement (PMC4595058; doi:10.1186/s13068-015-0349-1), 2015-10-06
Supplement: 13068_2015_349_MOESM2_ESM.pdf [file 13068_2015_349_MOESM2_ESM.pdf]

**Additional file 2: List of standard fatty acids used as calibration standards for ratiometric analysis of Raman spectra.**

| <b>Sample</b>                               | <b>Mol. Wt.</b> | <b>C-atoms</b> | <b>C=C bonds</b> | <b>N<sub>C=C</sub> / N<sub>CH<sub>2</sub></sub></b> | <b>Lipid number</b> | <b>T<sub>m</sub> (°C)</b> |
|---------------------------------------------|-----------------|----------------|------------------|-----------------------------------------------------|---------------------|---------------------------|
| <b>Myristic acid</b>                        | 228.37          | 14             | 0                | 0                                                   | 14:0                | 54                        |
| <b>Palmitic acid</b>                        | 256.42          | 16             | 0                | 0                                                   | 16:0                | 63                        |
| <b>Lignoceric acid</b>                      | 368.63          | 24             | 0                | 0                                                   | 24:0                | 84                        |
| <b>Myristoleic acid</b>                     | 226.36          | 14             | 1                | 0.11                                                | 14:1                | - 4                       |
| <b>Palmitoleic acid</b>                     | 245.41          | 16             | 1                | 0.08                                                | 16:1                | -0.1                      |
| <b>Oleic acid</b>                           | 282.46          | 18             | 1                | 0.07                                                | 18:1                | 13                        |
| <b>cis-11,14<br/>Eicosadienoic acid</b>     | 308.50          | 20             | 2                | 0.13                                                | 20:2                | 24                        |
| <b>Linoleic acid</b>                        | 280.45          | 18             | 2                | 0.15                                                | 18:2                | -5                        |
| <b>cis-8,11,14-<br/>Eicosatrienoic acid</b> | 306.48          | 20             | 3                | 0.25                                                | 20:3                | NA                        |
| <b>Linolenic acid</b>                       | 278.43          | 18             | 3                | 0.30                                                | 18:3                | -9.5                      |
| <b>Arachidonic acid</b>                     | 304.50          | 20             | 4                | 0.36                                                | 20:4                | -49                       |
