# Supplementary material for: An integrative Raman microscopy-based workflow for rapid in situ analysis of microalgal lipid bodies
Source: PubMed Central journal article supplement (PMC4595058; doi:10.1186/s13068-015-0349-1), 2015-10-06
Supplement: 13068_2015_349_MOESM3_ESM.pdf [file 13068_2015_349_MOESM3_ESM.pdf]

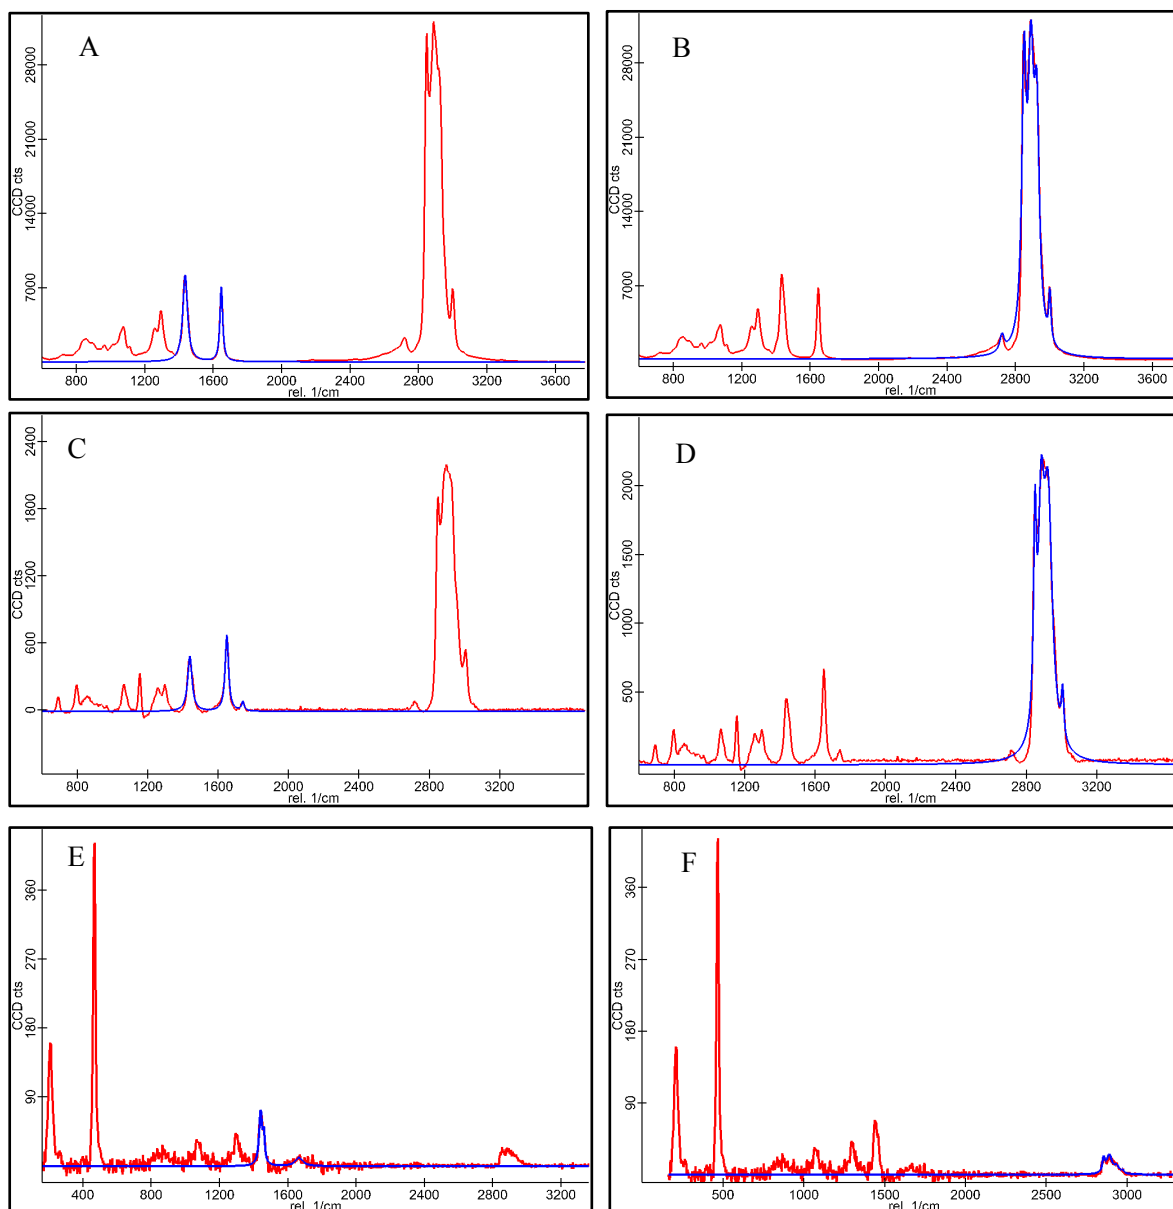

**Additional file 3:** Curve fitting of Raman spectra recorded for oleic acid (a and b) using 532 nm at 1650  $\text{cm}^{-1}$  and 3003  $\text{cm}^{-1}$ , respectively. Spectra c to f were recorded for *C. reinhardtii* (CC-503) microalgae using 532 nm (c and d) and 785 nm (e and f) excitations, with curve fitting at 1650  $\text{cm}^{-1}$  and 3003  $\text{cm}^{-1}$ , respectively. Red curves represent the background corrected Raman spectra whereas blue curves are results of curve-fitting respective band envelopes using combinations of Lorentzian peaks.

**Curve fitting information of 1650  $\text{cm}^{-1}$  with 3003  $\text{cm}^{-1}$  bands:**

The intensity ratio values ( $I_{1650}/I_{1440}$ ) and ( $I_{2900}/I_{1440}$ ) evaluated using Lorentzian curve fitting 1650  $\text{cm}^{-1}$  and the additional olefinic (=C-H stretch) peak located at 3003  $\text{cm}^{-1}$  with respect to 1440 peak for a pure fatty acid standard (oleic acid) and microalgae samples. As a proof of validation, we demonstrate the curve fitting and evaluated intensity ratios (shown in the table below) for oleic acid and the control, *C. reinhardtii* (CC-503) microalgae sample, using 532

and 785 nm excitations.

While comparing the intensity ratios 1650/1440, a significant overlap of  $-\text{CH}_2$  stretch located  $\sim 2900\text{ cm}^{-1}$  can be observed, which in turn results a decrease in carbonyl peak intensity ratio 2900/1440 but found to be satisfactory under these constraints.

| <b>Sample details</b>                            | <b>Excitation source</b> | <b><math>I_{1650}/I_{1440}</math></b> | <b><math>I_{2900}/I_{1440}</math></b> |
|--------------------------------------------------|--------------------------|---------------------------------------|---------------------------------------|
| <b>Oleic acid (A and B)</b>                      | 532 nm                   | 0.56                                  | 0.40                                  |
| <b><i>C. reinhardtii</i> (CC-503) ( C and D)</b> | 532 nm                   | 0.52                                  | 0.38                                  |
| <b><i>C. reinhardtii</i> (CC-503) ( E and F)</b> | 785 nm                   | 0.30                                  | 0.18                                  |
