# Supplementary material for: An integrative Raman microscopy-based workflow for rapid in situ analysis of microalgal lipid bodies
Source: PubMed Central journal article supplement (PMC4595058; doi:10.1186/s13068-015-0349-1), 2015-10-06
Supplement: 13068_2015_349_MOESM5_ESM.pdf [file 13068_2015_349_MOESM5_ESM.pdf]

## Additional file 5: Spectral band assignment identified in microalgal Raman spectra.

| Wave number (rel. cm) <sup>-1</sup> | Band assignment                                                                          |
|-------------------------------------|------------------------------------------------------------------------------------------|
| 744                                 | δH-C-O, δN-C-C chla                                                                      |
| 915                                 | δN-C-C, δC-C-C chla                                                                      |
| 988                                 | δCH <sub>3</sub> chla                                                                    |
| 1004-1008                           | Carotene C-H bending, ρ CH <sub>3</sub> , νCC β- carotene                                |
| 1056, 1116                          | C-C <i>trans</i> and <i>gauche</i> stretching,                                           |
| 1060                                | C-C skeleton stretching                                                                  |
| 1075                                | C-C <i>gauche</i> stretching                                                             |
| 1082                                | C-O-H bending                                                                            |
| 1085                                | C-C skeleton stretching                                                                  |
| 1120                                | C-O-H deformation, C-O stretching                                                        |
| 1125                                | C-C skeleton stretching                                                                  |
| 1157, 1160                          | β- carotene, carotene C-H stretching,                                                    |
| 1187                                | δCH, νC-N chla (1186 cm <sup>-1</sup> ) δCH β- carotene (1191 cm <sup>-1</sup> )         |
| 1230                                | δCH, νCC νC-N chla                                                                       |
| 1260                                | <i>cis</i> double bond =C-H bending                                                      |
| 1265                                | δCH <sub>3</sub> β- carotene and / or amide III of protein                               |
| 1289                                | δCH <sub>3</sub> , δCH, νC-N chla                                                        |
| 1300                                | CH <sub>2</sub> twisting                                                                 |
| 1308                                | δCH <sub>3</sub> , δCH chla                                                              |
| 1325                                | νC-N, δCH chla                                                                           |
| 1340                                | CH <sub>2</sub> deformation, chlorophyll C-N stretching                                  |
| 1348                                | δCH <sub>3</sub> , δCH, νC-N chla                                                        |
| 1389                                | δCH <sub>3</sub> , δCH, νC-N chla, δCH <sub>3</sub> β- carotene                          |
| 1438                                | νCC, , δCH <sub>3</sub> chla, , δCH <sub>3</sub> chla β- carotene                        |
| 1440                                | CH <sub>2</sub> bending                                                                  |
| 1495                                | νCC, δCH <sub>3</sub> chla                                                               |
| 1500-1600                           | β- carotene (C=C stretching)                                                             |
| 1525                                | Y <sub>(C=C)</sub> β-carotene (1524 cm <sup>-1</sup> ) νCC chla (1535 cm <sup>-1</sup> ) |
| 1605                                | νCC chla                                                                                 |
| 1650                                | <i>cis</i> C=C stretching                                                                |
| 1670                                | νC=O chla and /or amide I of protein                                                     |
| 1736                                | C=O stretches , ester stretching                                                         |
| 2800-2930                           | CH <sub>2</sub> , CH <sub>3</sub> symmetric and asymmetric stretching                    |
| 3023                                | =C-H stretching                                                                          |
